# Supplementary material for: Incidence and Risk Factors of COVID-19 Vaccine Breakthrough Infections: A Prospective Cohort Study in Belgium
Source: MDPI journal article supplement (doi:10.3390/v14040802), 2022-04-13
Supplement: s1 [file s1]

## Supplementary Materials

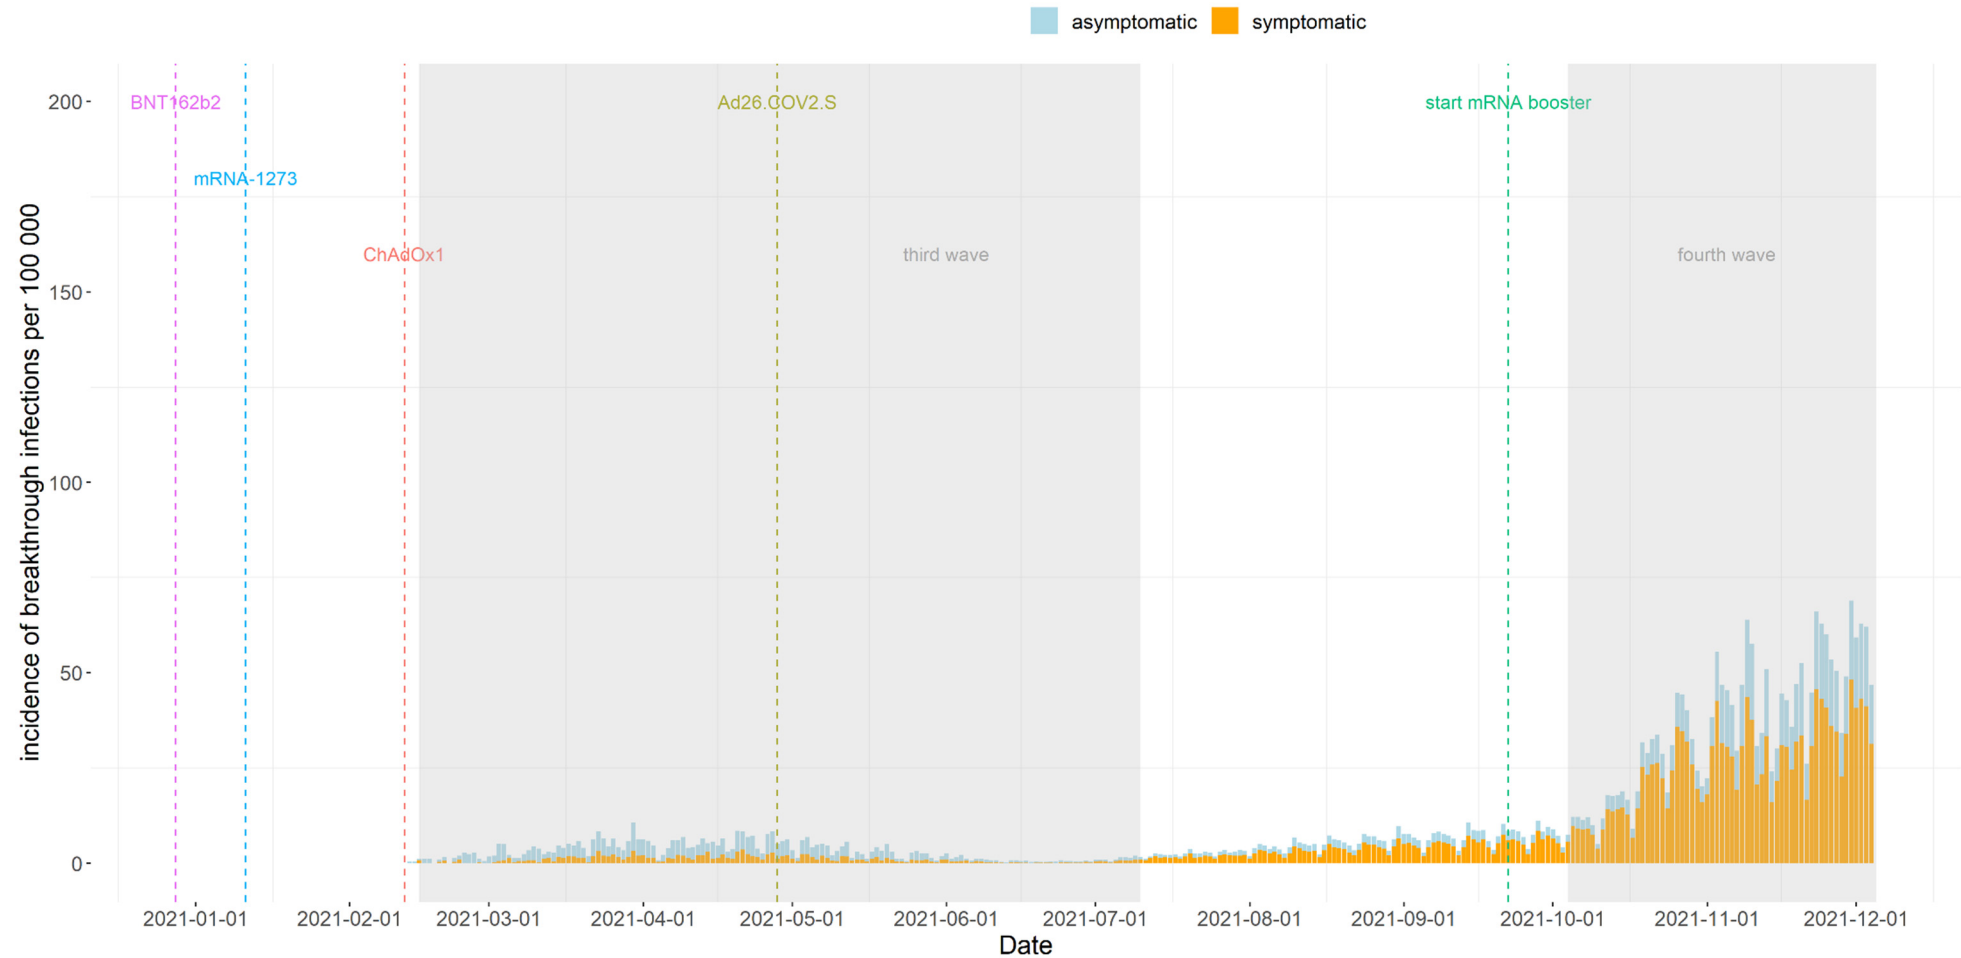

**Figure S1:** Daily incidence of symptomatic or asymptomatic breakthrough infections per 100,000 persons during 2021 among fully vaccinated persons (bars). Dashed lines represent introduction of different primary vaccine brands or of mRNA booster. Shaded areas represent occurrence of waves of COVID-19 infections in Belgium.

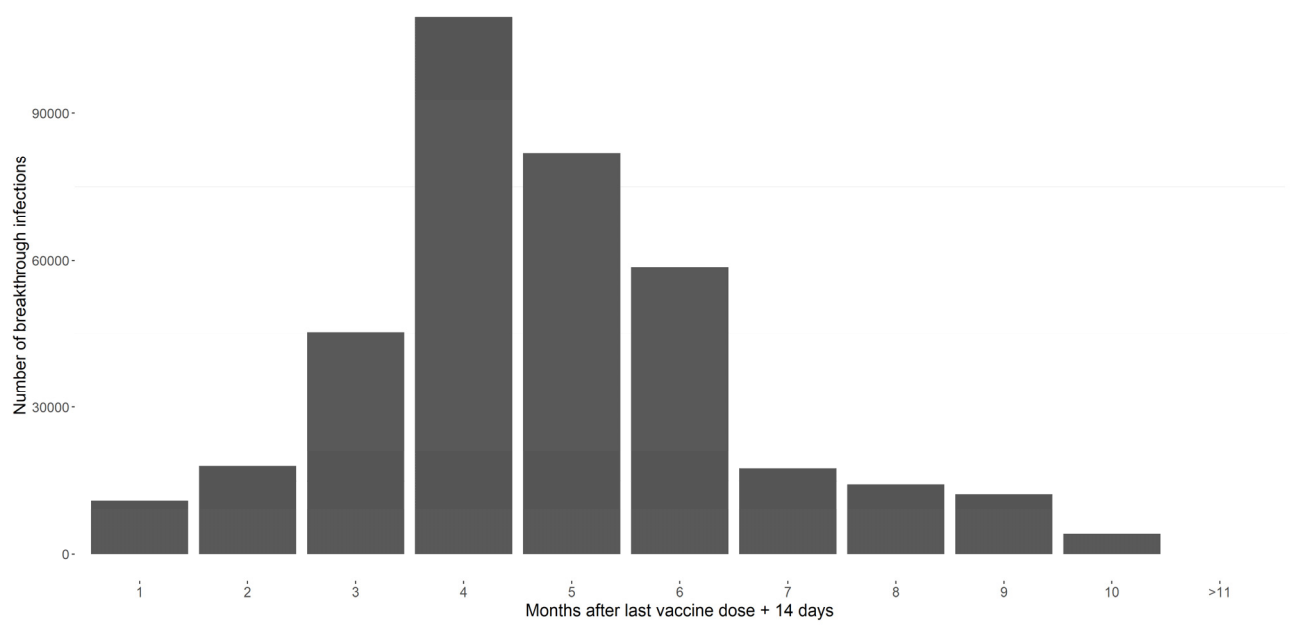

**Figure S2:** Number of breakthrough infections among fully vaccinated persons by month after 14 days after last dose of the primary vaccine scheme.

**Table S1:** Demographic and clinical characteristics of adult individuals who have been fully vaccinated and those with a breakthrough infection during alpha VOC dominance period, between February, 1, 2021 and June, 18, 2021.

|                                       | Fully vaccinated <sup>1</sup><br>(> 14 days) | Breakthrough<br>infection, n (%) | Incidence per 100<br>person-years (95%CI) |
|---------------------------------------|----------------------------------------------|----------------------------------|-------------------------------------------|
| <b>overall</b>                        | 2,455,751                                    | 4,654                            | 1.8 (1.8-1.9)                             |
| Sex                                   |                                              |                                  |                                           |
| Female                                | 1,452,346 (59.1%)                            | 3,278 (70.4%)                    | 1.9 (1.9-2.0)                             |
| Male                                  | 1,003,405 (40.9%)                            | 1,376 (29.6%)                    | 1.6 (1.5-1.7)                             |
| Age categories (years)                |                                              |                                  |                                           |
| 18-24                                 | 76,543 (3.1%)                                | 235 (5.0%)                       | 2.2 (1.9-2.5)                             |
| 25-34                                 | 168,335 (6.9%)                               | 555 (11.9%)                      | 2.2 (2.0-2.4)                             |
| 35-44                                 | 193,650 (7.9%)                               | 631 (13.6%)                      | 2.4 (2.2-2.6)                             |
| 45-54                                 | 283,981 (11.6%)                              | 608 (13.1%)                      | 1.9 (1.8-2.1)                             |
| 55-64                                 | 403,765 (16.4%)                              | 535 (11.5%)                      | 1.4 (1.3-1.5)                             |
| 65-74                                 | 619,217 (25.2%)                              | 388 (8.3%)                       | 1.0 (0.9-1.1)                             |
| 75-84                                 | 514,598 (21.0%)                              | 633 (13.6%)                      | 1.3 (1.2-1.4)                             |
| ≥85                                   | 195,662 (8.0%)                               | 1,069 (23.0%)                    | 2.9 (2.7-3.0)                             |
| Brand of primary vaccine              |                                              |                                  |                                           |
| BNT162b2                              | 1,967,424 (80.1%)                            | 4,336 (93.2%)                    | 1.9 (1.9-2.0)                             |
| mRNA-1273                             | 206,312 (8.4%)                               | 214 (4.6%)                       | 1.0 (0.9-1.1)                             |
| ChAdOx1                               | 188,659 (7.7%)                               | 40 (0.9%)                        | 0.9 (0.6-1.1)                             |
| Ad26.COV2.S                           | 93,356 (3.8%)                                | 64 (1.4%)                        | 1.6 (1.2-2.0)                             |
| Healthcare worker                     |                                              |                                  |                                           |
| No                                    | 2,093,262 (85.2%)                            | 3,276 (70.4%)                    | 1.7 (1.7-1.8)                             |
| Yes                                   | 362,489 (14.8%)                              | 1,378 (29.6%)                    | 2.1 (2.0-2.2)                             |
| Prior COVID-19 infection <sup>2</sup> |                                              |                                  |                                           |
| No                                    | 2,256,293 (91.9%)                            | 3,865 (83.0%)                    | 1.7 (1.7-1.8)                             |
| Yes                                   | 199,458 (8.1%)                               | 789 (17.0%)                      | 2.7 (2.5-2.9)                             |
| Number of COVID-19 tests <sup>3</sup> |                                              |                                  |                                           |
| 0-3                                   | 2,392,818 (97.4%)                            | 2,788 (59.9%)                    | 1.1 (1.1-1.2)                             |
| ≥4                                    | 62,933 (2.6%)                                | 1,866 (40.1%)                    | 18.5 (17.7-19.4)                          |

<sup>1</sup> Fully vaccinated = vaccinated with a complete primary vaccination scheme for at least 14 days with a COVID-19 vaccine approved by the European Medicine Agency, between February 1, 2021 and December 5, 2021.

<sup>2</sup> Prior COVID-19 infection = positive PCR or Rapid Antigen test recorded in the COVID-19 Laboratory test result database prior to date of first dose of primary vaccine schedule. Serology and auto-tests are not considered.

<sup>3</sup> Number of COVID-19 tests = The total number of SARS-CoV-2 tests (negative or positive) performed during the study period per person was used as a proxy for a person's high or a low frequency testing profile (e.g. persons subject to routine COVID-19 screening in the context of high-risk occupational exposure or as a prevention policy in medical or residential care facilities), with a cut-off of ≥4 tests.

**Table S2:** Demographic and clinical characteristics of adult individuals who have been fully vaccinated and those with a breakthrough infection, during delta VOC dominance period, between July, 15, 2021 and December, 5, 2021.

|                                       | Fully vaccinated <sup>1</sup><br>(> 14 days) | Breakthrough<br>infection, n (%) | Incidence per 100<br>person-years (95%CI) |
|---------------------------------------|----------------------------------------------|----------------------------------|-------------------------------------------|
| <b>overall</b>                        | 3,943,920                                    | 174,996                          | 14.2 (14.2-14.3)                          |
| Sex                                   |                                              |                                  |                                           |
| Female                                | 1,840,575 (46.7%)                            | 86,168 (49.2%)                   | 15.0 (14.9-15.1)                          |
| Male                                  | 2,103,345 (53.3%)                            | 88,828 (50.8%)                   | 13.5 (13.4-13.6)                          |
| Age categories (years)                |                                              |                                  |                                           |
| 18-24                                 | 596,657 (15.1%)                              | 19,093 (10.9%)                   | 11.5 (11.3-11.6)                          |
| 25-34                                 | 910,409 (23.1%)                              | 40,892 (23.4%)                   | 15.2 (15.0-15.3)                          |
| 35-44                                 | 864,376 (21.9%)                              | 52,211 (29.8%)                   | 19.2 (19.0-19.4)                          |
| 45-54                                 | 683,151 (17.3%)                              | 31,842 (18.2%)                   | 14.4 (14.3-14.6)                          |
| 55-64                                 | 562,095 (14.3%)                              | 21,215 (12.1%)                   | 11.2 (11.1-11.4)                          |
| 65-74                                 | 274,223 (7.0%)                               | 8,514 (4.9%)                     | 9.0 (8.8-9.1)                             |
| 75-84                                 | 38,501 (1.0%)                                | 881 (0.5%)                       | 7.2 (6.7-7.6)                             |
| ≥85                                   | 14,508 (0.4%)                                | 348 (0.2%)                       | 8.2 (7.3-9.0)                             |
| Brand of primary vaccine              |                                              |                                  |                                           |
| BNT162b2                              | 2,751,540 (69.8%)                            | 125,180 (71.5%)                  | 14.7 (14.7-14.8)                          |
| mRNA-1273                             | 256,333 (6.5%)                               | 7,578 (4.3%)                     | 9.4 (9.2-9.6)                             |
| ChAdOx1                               | 789,742 (20.0%)                              | 36,361 (20.8%)                   | 13.8 (13.6-13.9)                          |
| Ad26.COV2.S                           | 146,305 (3.7%)                               | 5,877 (3.4%)                     | 16.3 (15.9-16.7)                          |
| Healthcare worker                     |                                              |                                  |                                           |
| No                                    | 3,875,312 (98.3%)                            | 171,854 (98.2%)                  | 14.2 (14.1-14.3)                          |
| Yes                                   | 68,608 (1.7%)                                | 3,142 (1.8%)                     | 15.7 (15.1-16.2)                          |
| Prior COVID-19 infection <sup>2</sup> |                                              |                                  |                                           |
| No                                    | 3,568,833 (90.5%)                            | 171,271 (97.9%)                  | 15.3 (15.3-15.4)                          |
| Yes                                   | 375,087 (9.5%)                               | 3,725 (2.1%)                     | 3.3 (3.2-3.4)                             |
| Number of COVID-19 tests <sup>3</sup> |                                              |                                  |                                           |
| 0-3                                   | 3,899,404 (98.9%)                            | 167,994 (96.0%)                  | 13.8 (13.8-13.9)                          |
| ≥4                                    | 44,516 (1.1%)                                | 7,002 (4.0%)                     | 49.2 (48.0-50.3)                          |

<sup>1</sup> Fully vaccinated = vaccinated with a complete primary vaccination scheme for at least 14 days with a COVID-19 vaccine approved by the European Medicine Agency, between February 1, 2021 and December 5, 2021.

<sup>2</sup> Prior COVID-19 infection = positive PCR or Rapid Antigen test recorded in the COVID-19 Laboratory test result database prior to date of first dose of primary vaccine schedule. Serology and auto-tests are not considered.

<sup>3</sup> Number of COVID-19 tests = The total number of SARS-CoV-2 tests (negative or positive) performed during the study period per person was used as a proxy for a person's high or a low frequency testing profile(e.g. persons subject to routine COVID-19 screening in the context of high-risk occupational exposure or as a prevention policy in medical or residential care facilities), with a cut-off of ≥4 tests.

**Table S3:** Demographic and clinical characteristics of adult individuals with a symptomatic or an asymptomatic breakthrough infection after full vaccination, as of December, 5, 2021.

|                                             | Breakthrough infection, n (%) | Breakthrough infection with information on symptoms, n (%) | Symptomatic breakthrough infection, n (%) | Asymptomatic breakthrough infection, n (%) |
|---------------------------------------------|-------------------------------|------------------------------------------------------------|-------------------------------------------|--------------------------------------------|
| <b>overall</b>                              | 373,070                       | 216,814                                                    | 151,888                                   | 64,926                                     |
| <b>Sex</b>                                  |                               |                                                            |                                           |                                            |
| Female                                      | 199,900 (53.6%)               | 119,507 (55.1%)                                            | 86,178 (56.7%)                            | 33,329 (51.3%)                             |
| Male                                        | 173,170 (46.4%)               | 97,307 (44.9%)                                             | 65,710 (43.3%)                            | 31,597 (48.7%)                             |
| <b>Age categories (years)</b>               |                               |                                                            |                                           |                                            |
| 18-24                                       | 31,133 (8.3%)                 | 16,915 (7.8%)                                              | 11,803 (7.8%)                             | 5,112 (7.9%)                               |
| 25-34                                       | 63,119 (16.9%)                | 36,692 (16.9%)                                             | 26,796 (17.6%)                            | 9,896 (15.2%)                              |
| 35-44                                       | 86,505 (23.2%)                | 54,675 (25.2%)                                             | 39,680 (26.1%)                            | 14,995 (23.1%)                             |
| 45-54                                       | 71,714 (19.2%)                | 42,839 (19.8%)                                             | 31,014 (20.4%)                            | 11,825 (18.2%)                             |
| 55-64                                       | 57,292 (15.4%)                | 32,458 (15.0%)                                             | 22,955 (15.1%)                            | 9,503 (14.6%)                              |
| 65-74                                       | 35,622 (9.5%)                 | 19,777 (9.1%)                                              | 12,826 (8.4%)                             | 6,951 (10.7%)                              |
| 75-84                                       | 19,761 (5.3%)                 | 10,107 (4.7%)                                              | 5,651 (3.7%)                              | 4,456 (6.9%)                               |
| ≥85                                         | 7,924 (2.1%)                  | 3,351 (1.5%)                                               | 1,163 (0.8%)                              | 2,188 (3.4%)                               |
| <b>Brand of primary vaccine</b>             |                               |                                                            |                                           |                                            |
| BNT162b2                                    | 257,119 (68.9%)               | 148,414 (68.5%)                                            | 102,860 (67.7%)                           | 45,554 (70.2%)                             |
| mRNA-1273                                   | 21,614 (5.8%)                 | 13,256 (6.1%)                                              | 8,866 (5.8%)                              | 4,390 (6.8%)                               |
| ChAdOx1                                     | 68,525 (18.4%)                | 40,334 (18.6%)                                             | 29,390 (19.3%)                            | 10,944 (16.9%)                             |
| Ad26.COVS.S                                 | 25,812 (6.9%)                 | 14,810 (6.8%)                                              | 10,772 (7.1%)                             | 4,038 (6.2%)                               |
| <b>Healthcare worker</b>                    |                               |                                                            |                                           |                                            |
| No                                          | 339,041 (90.9%)               | 195,626 (90.2%)                                            | 136,183 (89.7%)                           | 59,443 (91.6%)                             |
| Yes                                         | 34,029 (9.1%)                 | 21,188 (9.8%)                                              | 15,705 (10.3%)                            | 5,483 (8.4%)                               |
| <b>Prior COVID-19 infection<sup>1</sup></b> |                               |                                                            |                                           |                                            |
| No                                          | 363,710 (97.5%)               | 211,456 (97.5%)                                            | 149,259 (98.3%)                           | 62,197 (95.8%)                             |
| Yes                                         | 9,360 (2.5%)                  | 5,358 (2.5%)                                               | 2,629 (1.7%)                              | 2,729 (4.2%)                               |
| <b>Number of COVID-19 tests<sup>2</sup></b> |                               |                                                            |                                           |                                            |
| 0-3                                         | 345,544 (92.6%)               | 201,266 (92.8%)                                            | 142,756 (94.0%)                           | 58,510 (90.1%)                             |
| ≥4                                          | 27,526 (7.4%)                 | 15,548 (7.2%)                                              | 9,132 (6.0%)                              | 6,416 (9.9%)                               |
| <b>Booster vaccine received</b>             |                               |                                                            |                                           |                                            |
| No                                          | 353,608 (94.8%)               | 206,251 (95.1%)                                            | 146,431 (96.4%)                           | 59,820 (92.1%)                             |
| Yes                                         | 19,462 (5.2%)                 | 10,563 (4.9%)                                              | 5,457 (3.6%)                              | 5,106 (7.9%)                               |

<sup>1</sup> Prior COVID-19 infection = positive PCR or Rapid Antigen test recorded in the COVID-19 Laboratory test result database prior to date of first dose of primary vaccine schedule. Serology and auto-tests are not considered.

<sup>2</sup> Number of COVID-19 tests = The total number of SARS-CoV-2 tests (negative or positive) performed during the study period per person was used as a proxy for a person's high or a low frequency testing profile (e.g. persons subject to routine COVID-19 screening in the context of high-risk occupational exposure or as a prevention policy in medical or residential care facilities), with a cut-off of ≥4 tests.

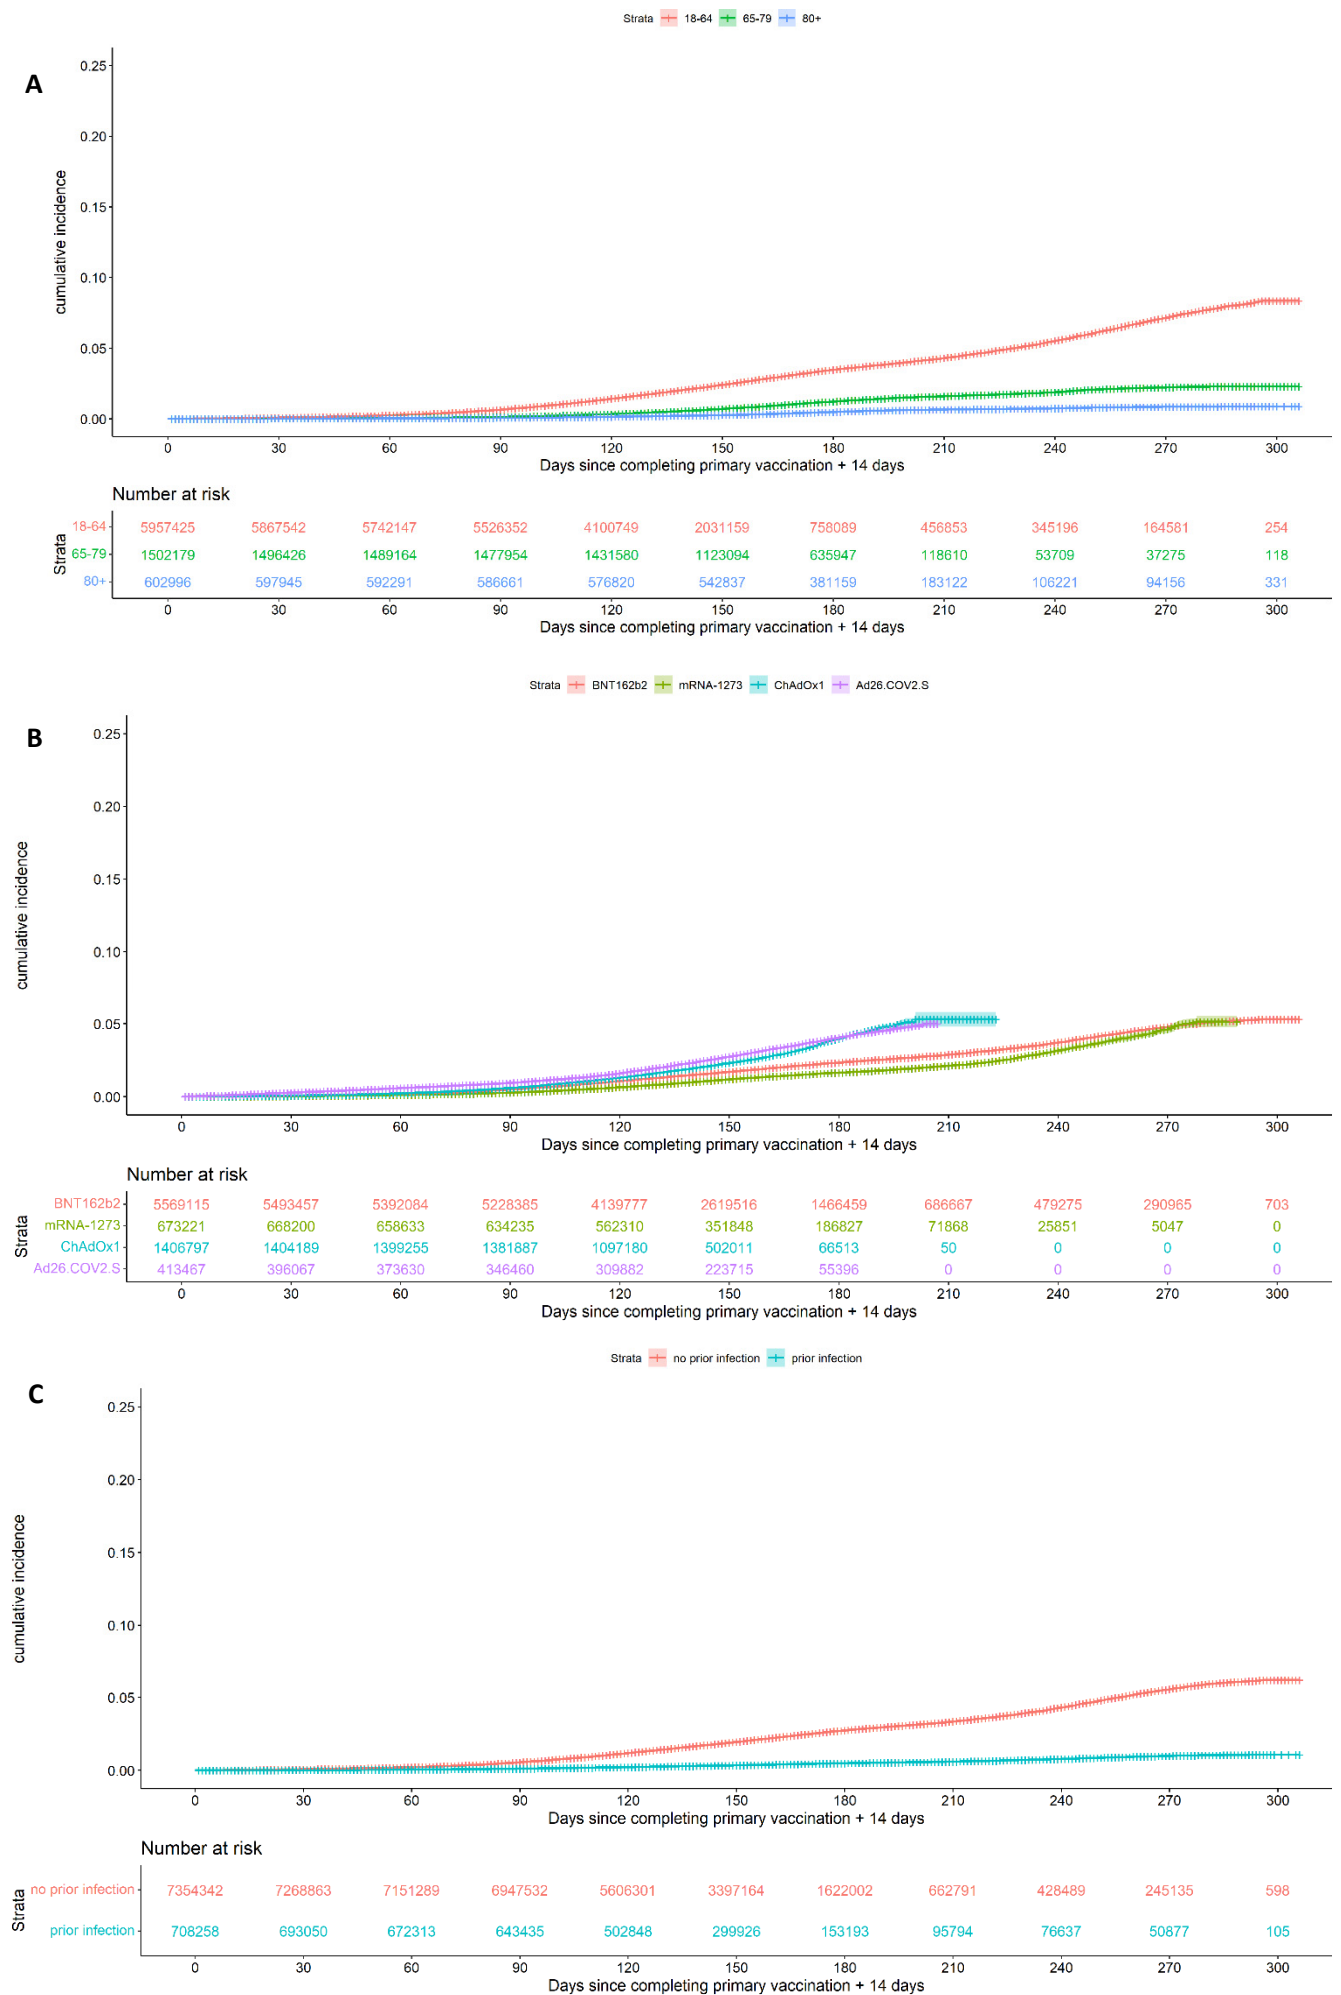

**Figure S3:** Cumulative incidence of symptomatic breakthrough infections among fully vaccinated individuals **(A)** by different age groups, **(B)** by brand of primary vaccine and **(C)** by prior COVID-19 infection. Shaded areas represent 95% confidence intervals.

**Table S4:** Sensitivity analyses based on multivariable Cox proportional hazards regressions.**A)** factors associated with symptomatic breakthrough infection

| Factor                                | Hazard ratio (95%) | p-value |
|---------------------------------------|--------------------|---------|
| Age (per 10 years increase)           | 0.85 (0.84-0.85)   | <0.001  |
| Male sex                              | 0.86 (0.85-0.87)   | <0.001  |
| Brand primary vaccine (ref: BNT162b2) |                    |         |
| mRNA-1273                             | 0.68 (0.67-0.70)   | <0.001  |
| ChAdOx1                               | 1.77 (1.75-1.79)   | <0.001  |
| Ad26.COV2.S                           | 1.56 (1.53-1.59)   | <0.001  |
| Healthcare worker                     | 0.74 (0.72-0.75)   | <0.001  |
| Prior COVID-19 infection              | 0.16 (0.15-0.16)   | <0.001  |
| Received booster                      | 0.33 (0.32-0.34)   | <0.001  |
| Background positivity rate            | 1.29 (1.28-1.29)   | <0.001  |
| High frequent testing profile         | 3.06 (2.99-3.12)   | <0.001  |

**B)** factors associated with breakthrough infection among fully vaccinated persons when censoring at time of booster administration (time till infection, or otherwise till administration of booster or end of follow-up or death)

| Factor                                | Hazard ratio (95%) | p-value |
|---------------------------------------|--------------------|---------|
| Age (per 10 years increase)           | 0.87 (0.86-0.87)   | <0.001  |
| Male sex                              | 0.98 (0.97-0.99)   | <0.001  |
| Brand primary vaccine (ref: BNT162b2) |                    |         |
| mRNA-1273                             | 0.68 (0.67-0.69)   | <0.001  |
| ChAdOx1                               | 1.69 (1.68-1.71)   | <0.001  |
| Ad26.COV2.S                           | 1.60 (1.58-1.62)   | <0.001  |
| Healthcare worker                     | 0.59 (0.58-0.60)   | <0.001  |
| Prior COVID-19 infection              | 0.23 (0.22-0.23)   | <0.001  |
| Background positivity rate            | 1.38 (1.37-1.38)   | <0.001  |
| High frequent testing profile         | 4.06 (4.01-4.12)   | <0.001  |

**C)** factors associated with breakthrough infection among boosted persons (time since booster dose till infection, or otherwise till end of follow-up or death)

| Factor                                | Hazard ratio (95%) | p-value |
|---------------------------------------|--------------------|---------|
| Age (per 10 years increase)           | 0.84 (0.82-0.86)   | <0.001  |
| Male sex                              | 1.12 (1.06-1.18)   | <0.001  |
| Brand primary vaccine (ref: BNT162b2) |                    |         |
| mRNA-1273                             | 0.66 (0.59-0.74)   | <0.001  |
| ChAdOx1                               | 0.91 (0.85-0.98)   | 0.011   |
| Ad26.COV2.S                           | 1.02 (0.86-1.21)   | 0.808   |
| Healthcare worker                     | 1.02 (0.92-1.12)   | 0.749   |
| Prior COVID-19 infection              | 0.41 (0.36-0.47)   | <0.001  |
| Background positivity rate            | 1.01 (0.99-1.03)   | 0.422   |
| High frequent testing profile         | 4.59 (4.13-5.10)   | <0.001  |

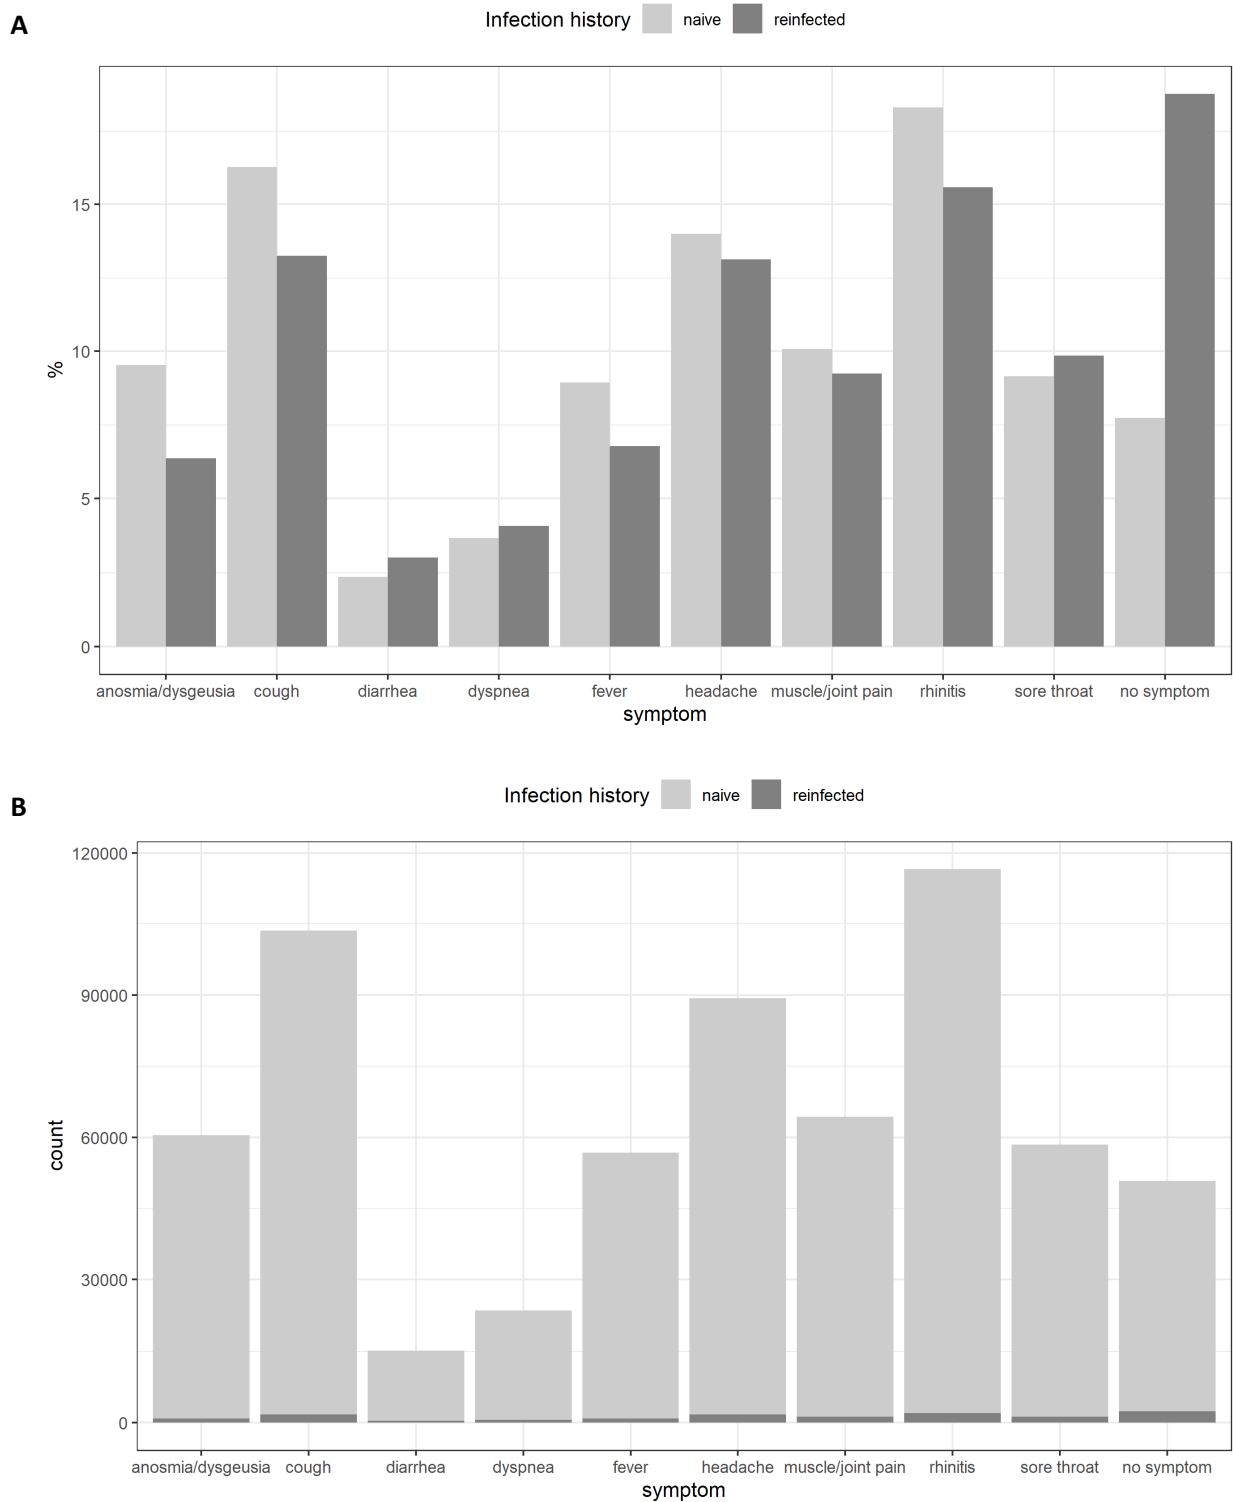

**Figure S4: (A) Percentages and (B) counts of each type of symptom or of having no symptoms among persons with a breakthrough infection, grouped by having had a prior COVID-19 infection before vaccination (reinfected) or not (naïve).**  
Persons with a breakthrough infection and having available data on symptoms were taken into account for this analysis.
